# Supplementary material for: Theoretical design of polythienylenevinylene derivatives for improvements of light-emitting and photovoltaic performances
Source: Royal Society of Chemistry journal article supplement (doi:10.1039/c1jm14956c), 2012-01-01
Supplement: c1jm14956c.pdf [file c1jm14956c.pdf]

## Electronic Supplementary Information

### 1. Full author list of Ref. 88

M. J. Frisch, G. W. Trucks, H. B. Schlegel, G. E. Scuseria, M. A. Robb, J. R. Cheeseman, J. A. Montgomery, Jr., T. Vreven, K. N. Kudin, J. C. Burant, J. M. Millam, S. S. Iyengar, J. Tomasi, V. Barone, B. Mennucci, M. Cossi, G. Scalmani, N. Rega, G. A. Petersson, H. Nakatsuji, M. Hada, M. Ehara, K. Toyota, R. Fukuda, J. Hasegawa, M. Ishida, T. Nakajima, Y. Honda, O. Kitao, H. Nakai, M. Klene, X. Li, J. E. Knox, H. P. Hratchian, J. B. Cross, V. Bakken, C. Adamo, J. Jaramillo, R. Gomperts, R. E. Stratmann, O. Yazyev, A. J. Austin, R. Cammi, C. Pomelli, J. W. Ochterski, P. Y. Ayala, K. Morokuma, G. A. Voth, P. Salvador, J. J. Dannenberg, V. G. Zakrzewski, S. Dapprich, A. D. Daniels, M. C. Strain, O. Farkas, D. K. Malick, A. D. Rabuck, K. Raghavachari, J. B. Foresman, J. V. Ortiz, Q. Cui, A. G. Baboul, S. Clifford, J. Cioslowski, B. B. Stefanov, G. Liu, A. Liashenko, P. Piskorz, I. Komaromi, R. L. Martin, D. J. Fox, T. Keith, M. A. Al-Laham, C. Y. Peng, A. Nanayakkara, M. Challacombe, P. M. W. Gill, B. Johnson, W. Chen, M. W. Wong, C. Gonzalez, and J. A. Pople, *Gaussian 03*, Revision C.02, Gaussian, Inc., Wallingford CT, 2004.

## 2. Evolution with temperature of the absorption and emission spectra calculated for COOH-PTV

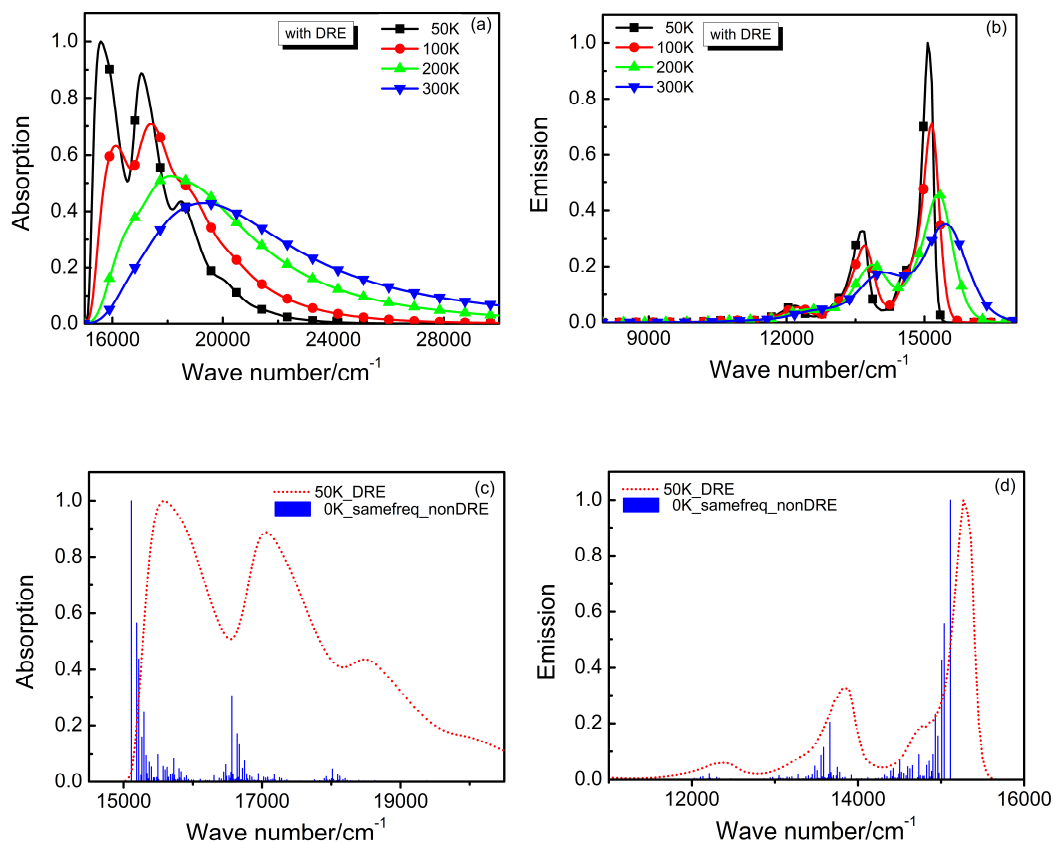

**Fig. S1** The theoretical absorption (a) and emission (b) spectra with DRE and distortion effect at different temperatures and the theoretical absorption (c) and emission (d) spectra at 0K without DRE and distortion effect compared to the spectra at 50K with DRE and distortion effect.

We calculate a series of spectra at different temperatures for COOH-PTV (Fig. S1(a) and Fig. S1(b)) considering DRE with distortion effect. As temperature decreases, the mirror symmetry of absorption and emission gradually recovers. According to Boltzmann distribution, as temperature increases, the contribution from higher frequency modes of the initial state will increase.

Considering the normal mode frequencies in ground state and excited state are different, the evolution of the absorption and the emission spectra with temperature also becomes different. Figure S1(c) and Figure S1(d) present the spectra with the displaced but undisorted oscillator model at 0 K for COOH-PTV compared to the spectra with DRE with distortion effect at 50K. It is seen that the former satisfies the mirror symmetry. Thus, the observed spectra asymmetry is attributed to the potential energy surface distortion effect.

### 3. Ground state and excited state vibrational mode frequencies with Huang-Rhys factors for COOH-, NO<sub>2</sub>-, and CHO-6TV.

**Table S1.** The frequencies and Huang-Rhys factors (HR) of ground state and excited state vibrational modes for COOH-6TV. Out of the total 240 normal modes, only the modes with HR larger than  $1 \times 10^{-4}$  are listed.

| Mode order | S <sub>0</sub> Freq. (cm <sup>-1</sup> ) | S <sub>0</sub> HR | S <sub>1</sub> Freq. (cm <sup>-1</sup> ) | S <sub>1</sub> HR |
|------------|------------------------------------------|-------------------|------------------------------------------|-------------------|
| 1          | 16.67                                    | 0.0445            | 18.59                                    | 0.0535            |
| 2          | 38.54                                    | 0.0705            | 39.42                                    | 0.0836            |
| 3          | 75.62                                    | 0.5633            | 75.21                                    | 0.6190            |
| 4          | 105.63                                   | 0.4332            | 108.19                                   | 0.4042            |
| 5          | 121.02                                   | 0.0173            | 121.65                                   | 0.0262            |
| 6          | 138.45                                   | 0.0222            | 138.83                                   | 0.0204            |
| 7          | 198.54                                   | 0.0088            | 199.45                                   | 0.0088            |
| 8          | 226.63                                   | 0.0101            | 227.94                                   | 0.0107            |
| 9          | 245.58                                   | 0.0026            | 245.78                                   | 0.0026            |
| 10         | 262.15                                   | 0.0002            | 262.12                                   | 0.0001            |
| 11         | 307.66                                   | 0.0004            | 310.86                                   | 0.0002            |
| 12         | 372.48                                   | 0.0038            | 372.05                                   | 0.0031            |
| 13         | 376.10                                   | 0.0047            | 375.80                                   | 0.0076            |
| 14         | 381.59                                   | 0.0960            | 380.27                                   | 0.0965            |
| 15         | 421.20                                   | 0.0002            | 418.69                                   | 0.0001            |
| 16         | 423.66                                   | 0.0005            | 422.39                                   | 0.0002            |
| 17         | 507.56                                   | 0.0036            | 507.27                                   | 0.0031            |
| 18         | 515.84                                   | 0.0502            | 516.42                                   | 0.0461            |

---

|    |         |        |         |        |
|----|---------|--------|---------|--------|
| 19 | 606.30  | 0.0013 | 601.74  | 0.0072 |
| 20 | 611.96  | 0.0805 | 606.34  | 0.0698 |
| 21 | 677.96  | 0.0001 | 677.40  | 0.0001 |
| 22 | 694.66  | 0.0008 | 692.06  | 0.0008 |
| 23 | 736.72  | 0.0002 | 733.15  | 0.0002 |
| 24 | 758.98  | 0.0004 | 757.39  | 0.0003 |
| 25 | 828.96  | 0.0005 | 820.50  | 0.0010 |
| 26 | 880.29  | 0.0002 | 879.63  | 0.0002 |
| 27 | 898.43  | 0.0015 | 893.78  | 0.0010 |
| 28 | 924.16  | 0.0002 | 915.83  | 0.0007 |
| 29 | 940.73  | 0.0035 | 930.53  | 0.0034 |
| 30 | 1095.52 | 0.0022 | 1098.53 | 0.0006 |
| 31 | 1099.56 | 0.0030 | 1104.33 | 0.0000 |
| 32 | 1111.82 | 0.0002 | 1114.06 | 0.0002 |
| 33 | 1165.93 | 0.0045 | 1163.66 | 0.0025 |
| 34 | 1189.30 | 0.0001 | 1189.00 | 0.0004 |
| 35 | 1192.12 | 0.0005 | 1192.34 | 0.0020 |
| 36 | 1193.16 | 0.0204 | 1199.18 | 0.0132 |
| 37 | 1211.65 | 0.0001 | 1213.34 | 0.0002 |
| 38 | 1241.01 | 0.0011 | 1250.14 | 0.0019 |
| 39 | 1241.34 | 0.0022 | 1256.45 | 0.0056 |
| 40 | 1332.90 | 0.0331 | 1302.12 | 0.0221 |
| 41 | 1348.98 | 0.0004 | 1328.88 | 0.0142 |
| 42 | 1349.88 | 0.0023 | 1343.52 | 0.0004 |
| 43 | 1353.49 | 0.0000 | 1354.40 | 0.0048 |
| 44 | 1358.31 | 0.0002 | 1371.46 | 0.0160 |
| 45 | 1361.18 | 0.0570 | 1365.39 | 0.0393 |
| 46 | 1375.12 | 0.0177 | 1378.67 | 0.0010 |
| 47 | 1382.38 | 0.0089 | 1385.15 | 0.0002 |
| 48 | 1424.48 | 0.0004 | 1438.33 | 0.0001 |
| 49 | 1428.32 | 0.0114 | 1434.81 | 0.0031 |
| 50 | 1440.28 | 0.0027 | 1441.87 | 0.0013 |
| 51 | 1451.24 | 0.2762 | 1448.19 | 0.1255 |
| 52 | 1478.99 | 0.0089 | 1477.93 | 0.1116 |
| 53 | 1502.31 | 0.0000 | 1497.35 | 0.0017 |
| 54 | 1557.24 | 0.0035 | 1522.70 | 0.0297 |
| 55 | 1571.34 | 0.0098 | 1550.57 | 0.0116 |
| 56 | 1583.41 | 0.0018 | 1574.73 | 0.0005 |
| 57 | 1642.18 | 0.1088 | 1625.09 | 0.1084 |
| 58 | 1653.34 | 0.0003 | 1613.41 | 0.1074 |
| 59 | 1664.83 | 0.0116 | 1605.82 | 0.0001 |
| 60 | 1813.69 | 0.0003 | 1808.98 | 0.0001 |
| 61 | 1814.86 | 0.0001 | 1814.21 | 0.0001 |

---

**Table S2.** The frequencies and Huang-Rhys factors (HR) of ground state and excited state vibrational modes for NO<sub>2</sub>-6TV. Out of total 222 normal modes, only the modes with HR larger than  $1 \times 10^{-4}$  are listed.

| Mode order | S <sub>0</sub> Freq. (cm <sup>-1</sup> ) | S <sub>0</sub> HR | S <sub>1</sub> Freq. (cm <sup>-1</sup> ) | S <sub>1</sub> HR |
|------------|------------------------------------------|-------------------|------------------------------------------|-------------------|
| 1          | 17.30                                    | 0.0552            | 18.09                                    | 0.0619            |
| 2          | 38.84                                    | 0.0758            | 38.86                                    | 0.0916            |
| 3          | 78.40                                    | 0.5048            | 77.87                                    | 0.5590            |
| 4          | 108.00                                   | 0.4896            | 110.21                                   | 0.4519            |
| 5          | 132.31                                   | 0.0054            | 132.61                                   | 0.0088            |
| 6          | 149.66                                   | 0.0115            | 149.63                                   | 0.0101            |
| 7          | 205.44                                   | 0.0018            | 206.44                                   | 0.0020            |
| 8          | 237.61                                   | 0.0071            | 237.12                                   | 0.0081            |
| 9          | 257.31                                   | 0.0031            | 256.67                                   | 0.0030            |
| 10         | 265.17                                   | 0.0001            | 265.10                                   | 0.0000            |
| 11         | 383.64                                   | 0.0000            | 383.99                                   | 0.0018            |
| 12         | 388.86                                   | 0.0190            | 388.35                                   | 0.0190            |
| 13         | 396.69                                   | 0.0831            | 395.37                                   | 0.0827            |
| 14         | 425.30                                   | 0.0003            | 422.15                                   | 0.0024            |
| 15         | 432.65                                   | 0.0019            | 432.46                                   | 0.0032            |
| 16         | 529.99                                   | 0.0505            | 529.09                                   | 0.0190            |
| 17         | 531.25                                   | 0.0351            | 530.66                                   | 0.0611            |
| 18         | 551.76                                   | 0.0022            | 550.05                                   | 0.0027            |
| 19         | 589.58                                   | 0.0036            | 584.97                                   | 0.0039            |
| 20         | 614.81                                   | 0.0012            | 609.97                                   | 0.0070            |
| 21         | 621.98                                   | 0.0650            | 616.80                                   | 0.0540            |
| 22         | 733.83                                   | 0.0008            | 729.11                                   | 0.0009            |
| 23         | 754.84                                   | 0.0018            | 751.15                                   | 0.0012            |
| 24         | 782.93                                   | 0.0000            | 774.30                                   | 0.0001            |
| 25         | 795.20                                   | 0.0003            | 789.77                                   | 0.0001            |
| 26         | 808.88                                   | 0.0002            | 808.60                                   | 0.0001            |
| 27         | 873.57                                   | 0.0020            | 868.85                                   | 0.0031            |
| 28         | 884.53                                   | 0.0010            | 881.98                                   | 0.0004            |
| 29         | 900.61                                   | 0.0006            | 896.24                                   | 0.0003            |
| 30         | 945.10                                   | 0.0004            | 932.99                                   | 0.0012            |
| 31         | 954.28                                   | 0.0028            | 943.28                                   | 0.0016            |
| 32         | 1093.71                                  | 0.0087            | 1097.99                                  | 0.0031            |
| 33         | 1099.13                                  | 0.0000            | 1104.76                                  | 0.0003            |
| 34         | 1114.13                                  | 0.0013            | 1117.45                                  | 0.0011            |
| 35         | 1133.04                                  | 0.0001            | 1138.82                                  | 0.0001            |
| 36         | 1159.65                                  | 0.0001            | 1157.47                                  | 0.0002            |
| 37         | 1170.98                                  | 0.0037            | 1170.22                                  | 0.0027            |

|    |         |        |         |        |
|----|---------|--------|---------|--------|
| 38 | 1192.79 | 0.0006 | 1194.37 | 0.0007 |
| 39 | 1217.44 | 0.0001 | 1228.18 | 0.0016 |
| 40 | 1221.44 | 0.0089 | 1237.10 | 0.0101 |
| 41 | 1334.05 | 0.0129 | 1323.79 | 0.0102 |
| 42 | 1334.75 | 0.0148 | 1303.35 | 0.0212 |
| 43 | 1339.63 | 0.0022 | 1333.75 | 0.0020 |
| 44 | 1380.86 | 0.0029 | 1389.14 | 0.0004 |
| 45 | 1381.15 | 0.0026 | 1379.56 | 0.0039 |
| 46 | 1394.42 | 0.0196 | 1366.18 | 0.0021 |
| 47 | 1399.37 | 0.0268 | 1392.07 | 0.0004 |
| 48 | 1406.71 | 0.0710 | 1409.89 | 0.0677 |
| 49 | 1412.81 | 0.0018 | 1425.77 | 0.0249 |
| 50 | 1415.38 | 0.0001 | 1418.57 | 0.0586 |
| 51 | 1433.04 | 0.0015 | 1433.69 | 0.0012 |
| 52 | 1467.51 | 0.2301 | 1489.86 | 0.0887 |
| 53 | 1489.38 | 0.0170 | 1468.85 | 0.0239 |
| 54 | 1511.40 | 0.0000 | 1506.76 | 0.0015 |
| 55 | 1556.64 | 0.0057 | 1521.98 | 0.0652 |
| 56 | 1570.01 | 0.0079 | 1548.70 | 0.0108 |
| 57 | 1574.30 | 0.0042 | 1563.18 | 0.0002 |
| 58 | 1639.30 | 0.0851 | 1609.27 | 0.1053 |
| 59 | 1648.72 | 0.0000 | 1621.50 | 0.0640 |
| 60 | 1662.10 | 0.0240 | 1655.37 | 0.0058 |
| 61 | 1665.11 | 0.0001 | 1662.79 | 0.0020 |
| 62 | 1666.74 | 0.0062 | 1604.98 | 0.0099 |

**Table S3.** The frequencies and Huang-Rhys factors (HR) of ground state and excited state vibrational modes for CHO-6TV. Out of the total 222 normal modes, only those with HR larger than  $1 \times 10^{-4}$  are listed.

| Mode order | S <sub>0</sub> Freq. (cm <sup>-1</sup> ) | S <sub>0</sub> HR | S <sub>1</sub> Freq. (cm <sup>-1</sup> ) | S <sub>1</sub> HR |
|------------|------------------------------------------|-------------------|------------------------------------------|-------------------|
| 1          | 18.48                                    | 0.0097            | 21.06                                    | 0.0115            |
| 2          | 46.31                                    | 0.0183            | 46.93                                    | 0.0268            |
| 3          | 74.62                                    | 0.5411            | 73.38                                    | 0.6074            |
| 4          | 119.06                                   | 0.5311            | 120.87                                   | 0.4825            |
| 5          | 143.16                                   | 0.0540            | 142.67                                   | 0.0648            |
| 6          | 172.19                                   | 0.0075            | 172.21                                   | 0.0076            |
| 7          | 201.94                                   | 0.0035            | 202.66                                   | 0.0040            |
| 8          | 229.94                                   | 0.0006            | 231.16                                   | 0.0006            |

---

|    |         |        |         |        |
|----|---------|--------|---------|--------|
| 9  | 252.90  | 0.0090 | 252.74  | 0.0075 |
| 10 | 263.85  | 0.0032 | 262.79  | 0.0032 |
| 11 | 310.79  | 0.0011 | 313.05  | 0.0010 |
| 12 | 409.31  | 0.0001 | 408.62  | 0.0000 |
| 13 | 424.98  | 0.0152 | 424.12  | 0.0154 |
| 14 | 462.59  | 0.0064 | 460.38  | 0.0075 |
| 15 | 475.45  | 0.0006 | 473.66  | 0.0000 |
| 16 | 476.73  | 0.0005 | 476.58  | 0.0017 |
| 17 | 576.26  | 0.0156 | 572.01  | 0.0196 |
| 18 | 595.95  | 0.0330 | 591.32  | 0.0151 |
| 19 | 609.28  | 0.1122 | 602.28  | 0.1204 |
| 20 | 689.52  | 0.0002 | 683.83  | 0.0001 |
| 21 | 696.26  | 0.0025 | 686.39  | 0.0019 |
| 22 | 705.57  | 0.0006 | 703.27  | 0.0004 |
| 23 | 740.83  | 0.0017 | 735.92  | 0.0016 |
| 24 | 767.71  | 0.0009 | 766.75  | 0.0005 |
| 25 | 841.34  | 0.0048 | 834.73  | 0.0065 |
| 26 | 864.45  | 0.0019 | 859.69  | 0.0019 |
| 27 | 895.78  | 0.0012 | 890.16  | 0.0022 |
| 28 | 896.40  | 0.0004 | 896.11  | 0.0001 |
| 29 | 976.82  | 0.0002 | 964.46  | 0.0002 |
| 30 | 985.65  | 0.0002 | 973.12  | 0.0000 |
| 31 | 999.59  | 0.0004 | 997.96  | 0.0004 |
| 32 | 1106.13 | 0.0035 | 1116.17 | 0.0005 |
| 33 | 1119.11 | 0.0035 | 1121.77 | 0.0023 |
| 34 | 1135.57 | 0.0039 | 1140.56 | 0.0012 |
| 35 | 1192.32 | 0.0200 | 1195.04 | 0.0094 |
| 36 | 1195.74 | 0.0039 | 1203.81 | 0.0104 |
| 37 | 1204.15 | 0.0002 | 1206.91 | 0.0002 |
| 38 | 1248.45 | 0.0002 | 1260.10 | 0.0000 |
| 39 | 1253.46 | 0.0002 | 1267.52 | 0.0010 |
| 40 | 1332.53 | 0.0269 | 1304.14 | 0.0193 |
| 41 | 1358.13 | 0.0385 | 1334.47 | 0.0376 |
| 42 | 1359.48 | 0.0045 | 1346.79 | 0.0065 |
| 43 | 1368.19 | 0.0003 | 1376.60 | 0.0008 |
| 44 | 1374.53 | 0.0007 | 1382.99 | 0.0002 |
| 45 | 1389.84 | 0.0006 | 1391.35 | 0.0003 |
| 46 | 1404.91 | 0.0033 | 1416.39 | 0.0044 |
| 47 | 1406.08 | 0.0030 | 1411.22 | 0.0050 |
| 48 | 1435.07 | 0.2439 | 1428.12 | 0.1226 |
| 49 | 1456.00 | 0.0012 | 1449.26 | 0.0586 |
| 50 | 1467.05 | 0.0084 | 1465.78 | 0.0002 |
| 51 | 1473.43 | 0.0326 | 1480.83 | 0.0353 |
| 52 | 1491.70 | 0.0002 | 1487.25 | 0.0000 |

---

|    |         |        |         |        |
|----|---------|--------|---------|--------|
| 53 | 1546.27 | 0.0098 | 1523.17 | 0.0455 |
| 54 | 1562.46 | 0.0124 | 1547.32 | 0.0163 |
| 55 | 1571.65 | 0.0017 | 1563.22 | 0.0004 |
| 56 | 1639.80 | 0.0973 | 1621.97 | 0.0822 |
| 57 | 1650.66 | 0.0005 | 1610.98 | 0.0968 |
| 58 | 1663.92 | 0.0112 | 1606.55 | 0.0061 |
| 59 | 1792.51 | 0.0002 | 1781.87 | 0.0000 |
| 60 | 1794.02 | 0.0001 | 1791.36 | 0.0000 |

The difference in frequencies and Huang-Rhys factors between ground state and excited state modes are the main reason which causes the mirror asymmetry in COOH-PTV's spectra.

#### **4. Comparison of the optical spectra and the radiative/nonradiative decay rates for CHO-PTV to justify the approach to remove one mode with imaginary frequency**

In Fig. S2, we depict the calculated optical absorption and emission spectra: F1 and F2 indicate without and with replacement of the out-of-plane mode in excited state by that of the ground state. They are basically identical. Such operation only causes slight change for the non-radiative decay rate, see Table S4.



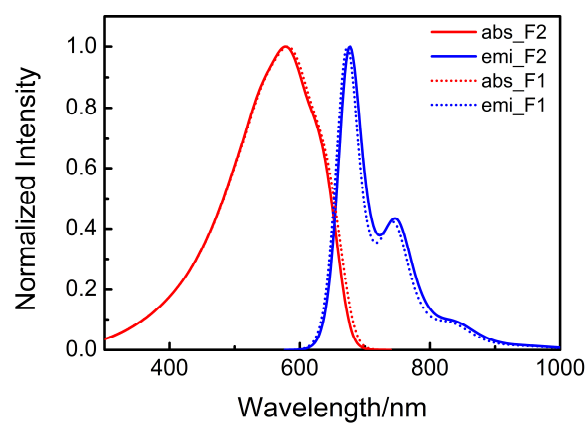

**Fig. S2.** The theoretical absorption and emission spectra of CHO-PTV resulted from F1 and F2.

**Table S4.** The theoretical radiative and nonradiative decay rates of CHO-PTV resulted from F1 and F2.

| frequencies     | F1                 | F2                 |
|-----------------|--------------------|--------------------|
| $k_r/s^{-1}$    | $4.61 \times 10^8$ | $4.50 \times 10^8$ |
| $k_{IC}/s^{-1}$ | $2.08 \times 10^6$ | $2.51 \times 10^6$ |
